# Supplementary material
Source: PubMed Central journal article supplement (PMC554799)
Supplement: pnas_102_11_4140__1.pdf [file pnas_102_11_4140__1.pdf]

**a**

| <u>SERONEGATIVE</u> |    |  | <u>SEROPOSITIVE</u> |    |  | <u>WATER</u> |  |  |
|---------------------|----|--|---------------------|----|--|--------------|--|--|
| MONO                | DC |  | MONO                | DC |  |              |  |  |

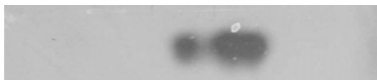

1 2 3 4 5 6 7 8 9

**b**

| <u>SERONEGATIVE DNA</u> |       |     |  | <u>SEROPOSITIVE DNA</u> |       |     |     |  |
|-------------------------|-------|-----|--|-------------------------|-------|-----|-----|--|
| CD34+                   | CD34+ | DDC |  | CD34+                   | CD34+ | DDC | DDC |  |

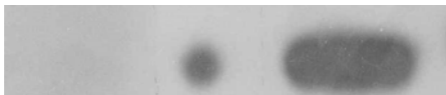

1 2 3 4 5 6 7 8 9

**c**

| <u>SERONEGATIVE</u> |          | <u>SEROPOSITIVE</u> |           |
|---------------------|----------|---------------------|-----------|
| CD34+               | CD34+DDC | CD34+               | CD34+ DDC |

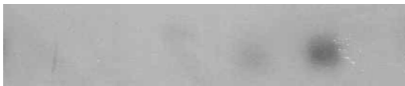

1 2 3 4
