# Supplementary material
Source: PubMed Central journal article supplement (PMC554799)

**a**

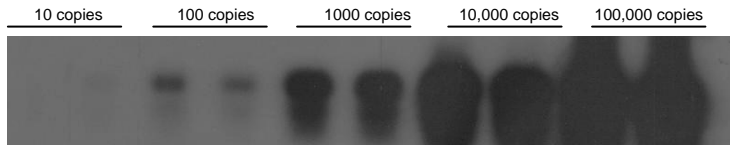

**b**

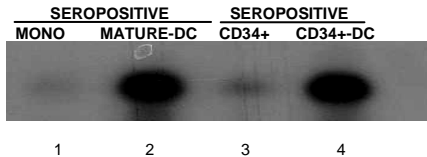

Supplement: pnas_102_11_4140__2.pdf [file pnas_102_11_4140__2.pdf]

SERONEGATIVE    SEROPOSITIVE  
MONO    MDDC    MONO    MDDC

HCMV  
DNA

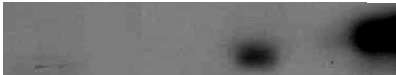

1

2

3

4

5

Supplement: pnas_102_11_4140__3.pdf [file pnas_102_11_4140__3.pdf]
